# Supplementary material
Source: PubMed Central journal article supplement (PMC3094059)

**A**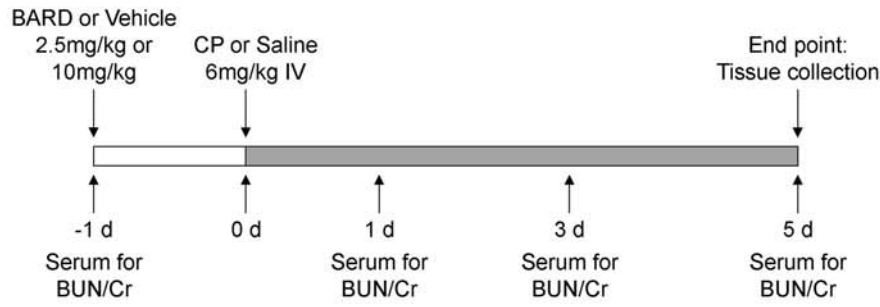**B**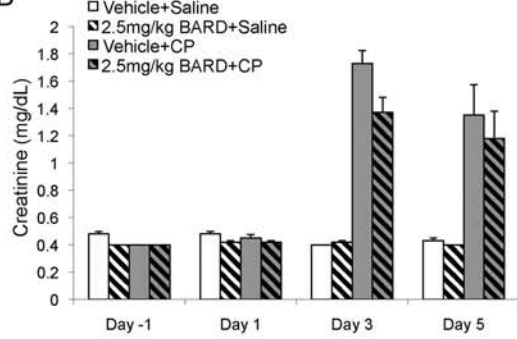**C**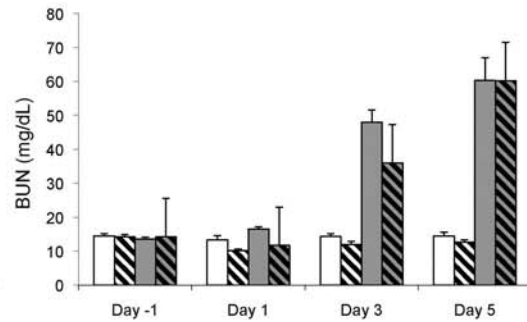**D**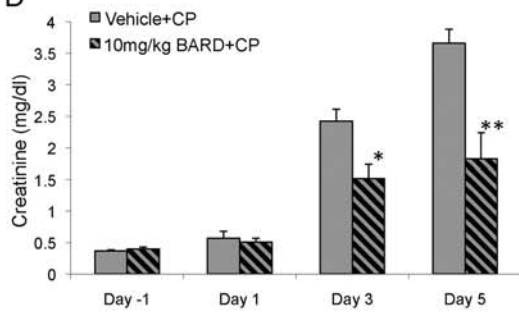**E**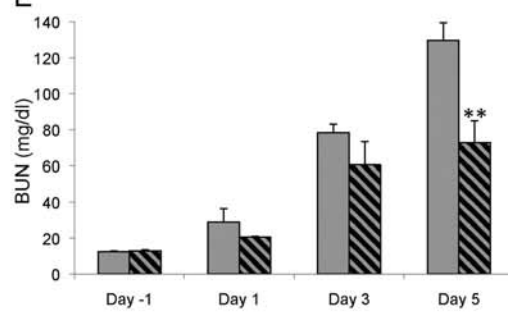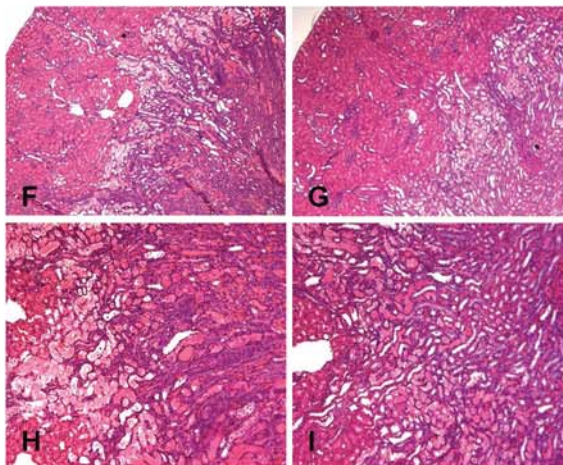**K**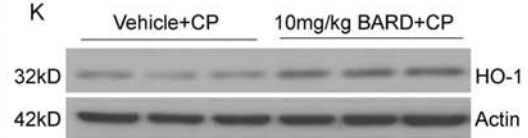**L**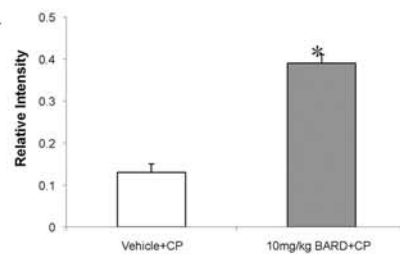**J**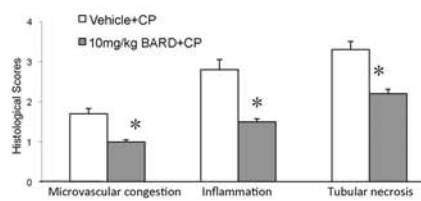

Supplement: suppfigS1.pdf [file suppfigS1.pdf]
